# Supplementary material
Source: MDPI journal article supplement (https://www.mdpi.com/1424-8247/14/8/760)
Supplement: s1 [file s1]

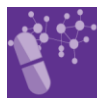

## Article

# Synthesis, Characterization and DNA-Binding Affinity of a New Zinc(II) Bis(5-methoxy-indol-3-yl)propane-1,3-dione Complex

Luca Scapinello <sup>1</sup>, Guglielmo Vesco <sup>1</sup>, Luca Nardo <sup>1</sup>, Angelo Maspero<sup>1,\*</sup>, Federico Vavassori <sup>1</sup>, Simona Galli <sup>1</sup>, Andrea Penoni <sup>1</sup>

<sup>1</sup> Università degli Studi dell'Insubria – Dept. of Science and High Technology, Via Valleggio 11, 22100 Como (CO); luca.scapinello@uninsubria.it (L.S.); gvesco@uninsubria.it (G.V.); luca.nardo@uninsubria.it (L.N.); angelo.maspero@uninsubria.it (A.M.); f.vavassori1@uninsubria.it (F.V.); simona.galli@uninsubria.it (S.G.); andrea.penoni@uninsubria.it (A.P.).

\* Correspondence: angelo.maspero@uninsubria.it ; Tel.: +39 031 238 6472

## Supplementary Online Materials

**Citation:** Scapinello, L.; Vesco, G.; Nardo, L.; Maspero, A.; Vavassori, F.; Galli, S. Synthesis, Characterization and DNA-Binding Affinity of a New Zinc(II) Bis(5-methoxy-indol-3-yl)propane-1,3-dione Complex. *Pharmaceuticals* **2021**, *14*, 760. <https://doi.org/10.3390/ph14080760>

Academic Editor: Jean Jacques Vanden Eynde

Received: 6 July 2021  
Accepted: 28 July 2021  
Published: 3 August 2021

**Publisher's Note:** MDPI stays neutral with regard to jurisdictional claims in published maps and institutional affiliations.

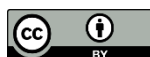

**Copyright:** © 2021 by the authors. Submitted for possible open access publication under the terms and conditions of the Creative Commons Attribution (CC BY) license (<http://creativecommons.org/licenses/by/4.0/>).

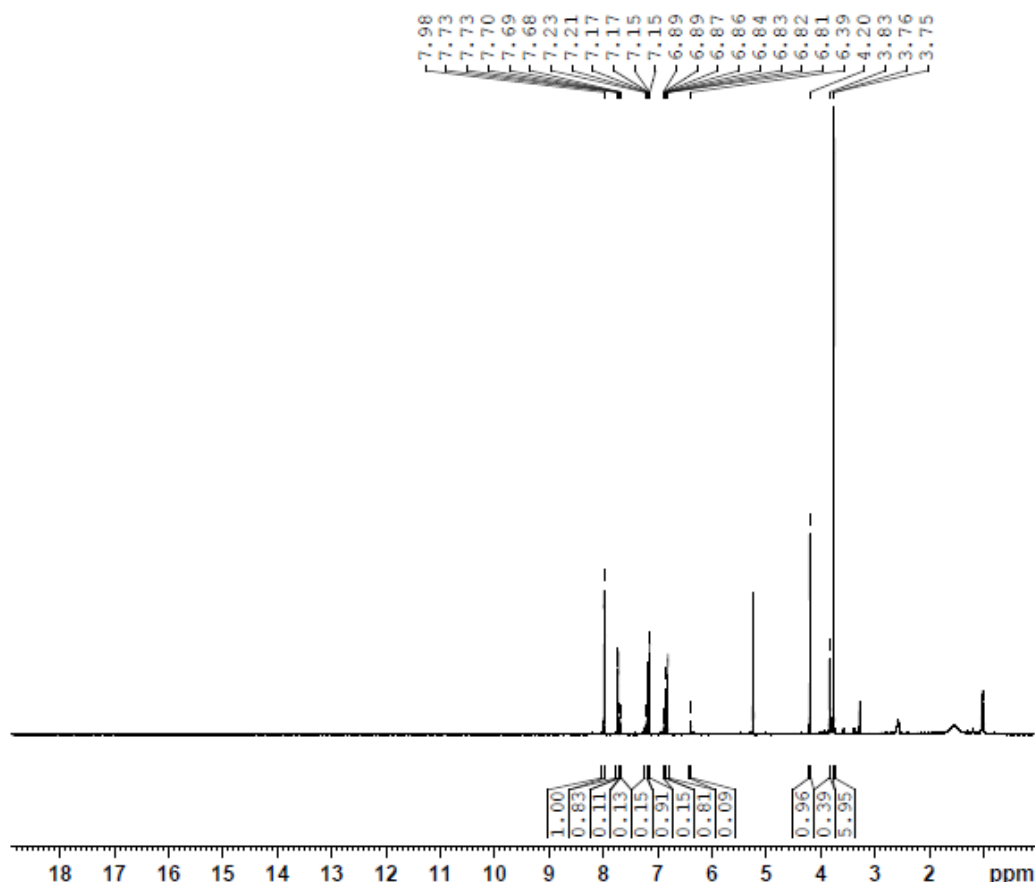

Figure S1. <sup>1</sup>H-NMR spectrum of 1.

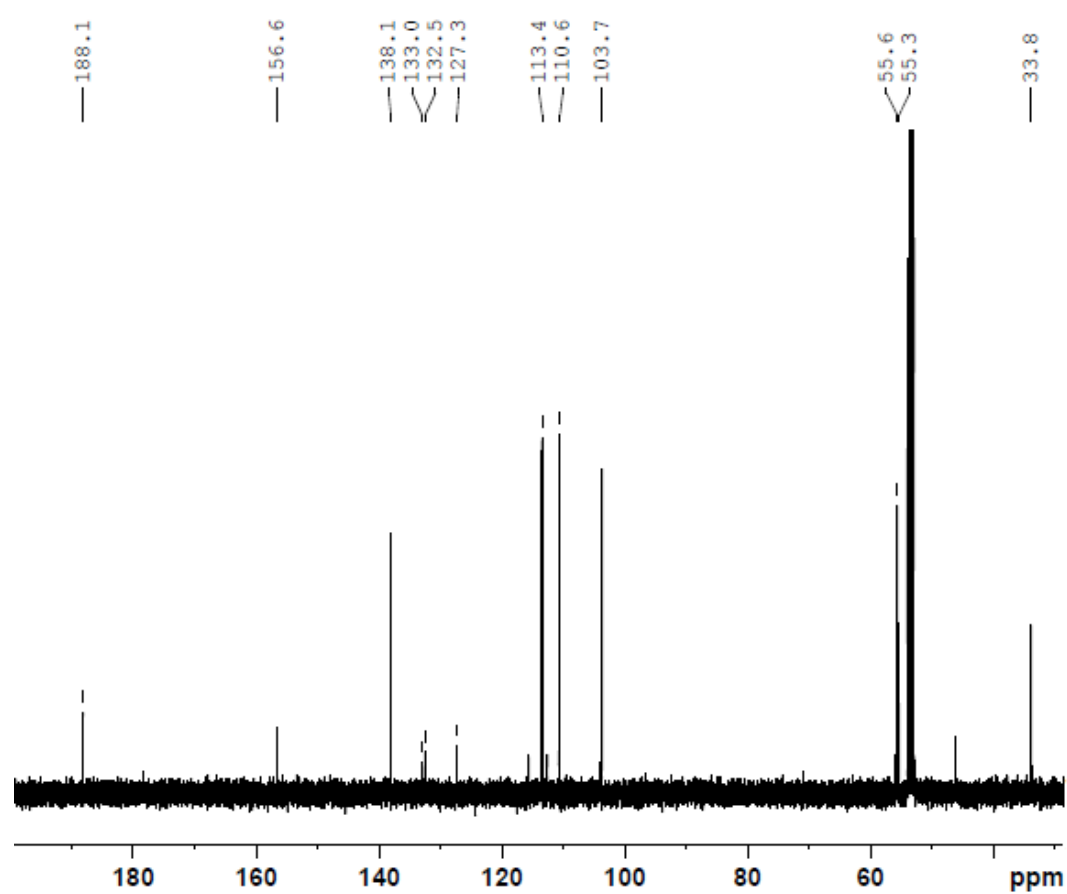

Figure S2.  $^{13}\text{C}$ -NMR spectrum of 1.

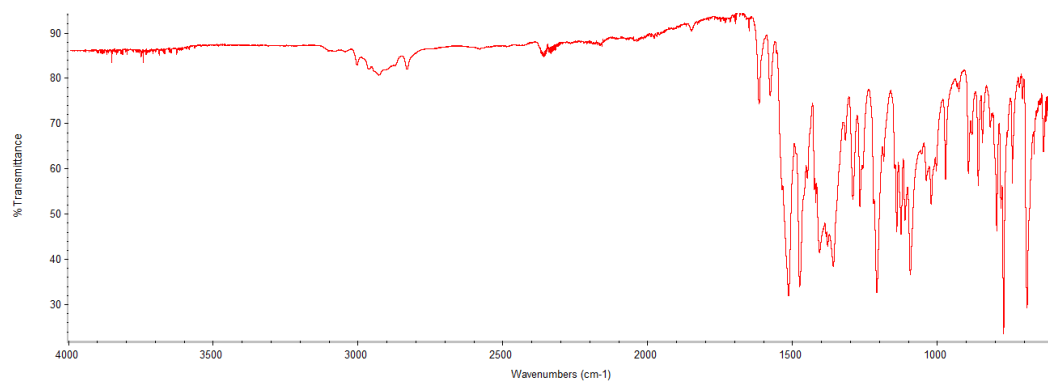

**Figure S3.** IR absorption spectrum of **1** in the 600 cm<sup>-1</sup> – 4000 cm<sup>-1</sup> spectral region.

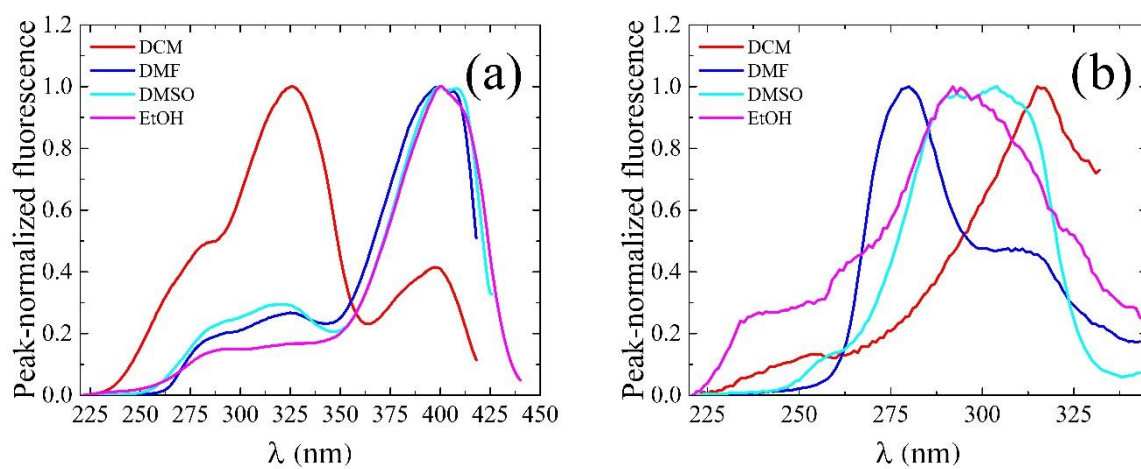

**Figure S4.** Fluorescence excitation spectral line-shapes of **1** in different solvents with fluorescence detection at a) the enol emission peak and b) 350 nm (in the region of the diketo-emission shoulder).

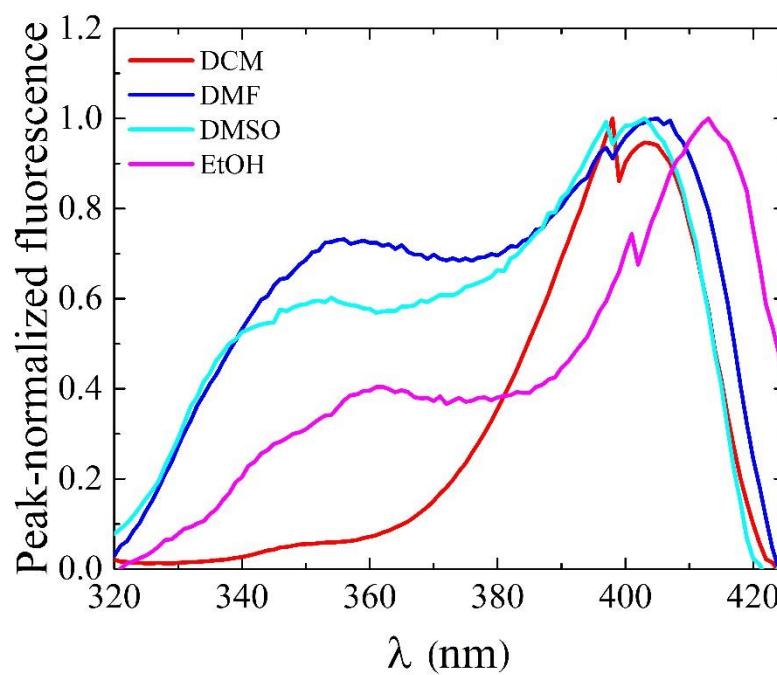

**Figure S5.** Reconstructed emission spectra of the diketo tautomers of **1**. With the exception of dichloromethane, the spectra exhibit two well separated peaks. This might indicate the coexistence of cis- and trans-diketo tautomers in polar environments.

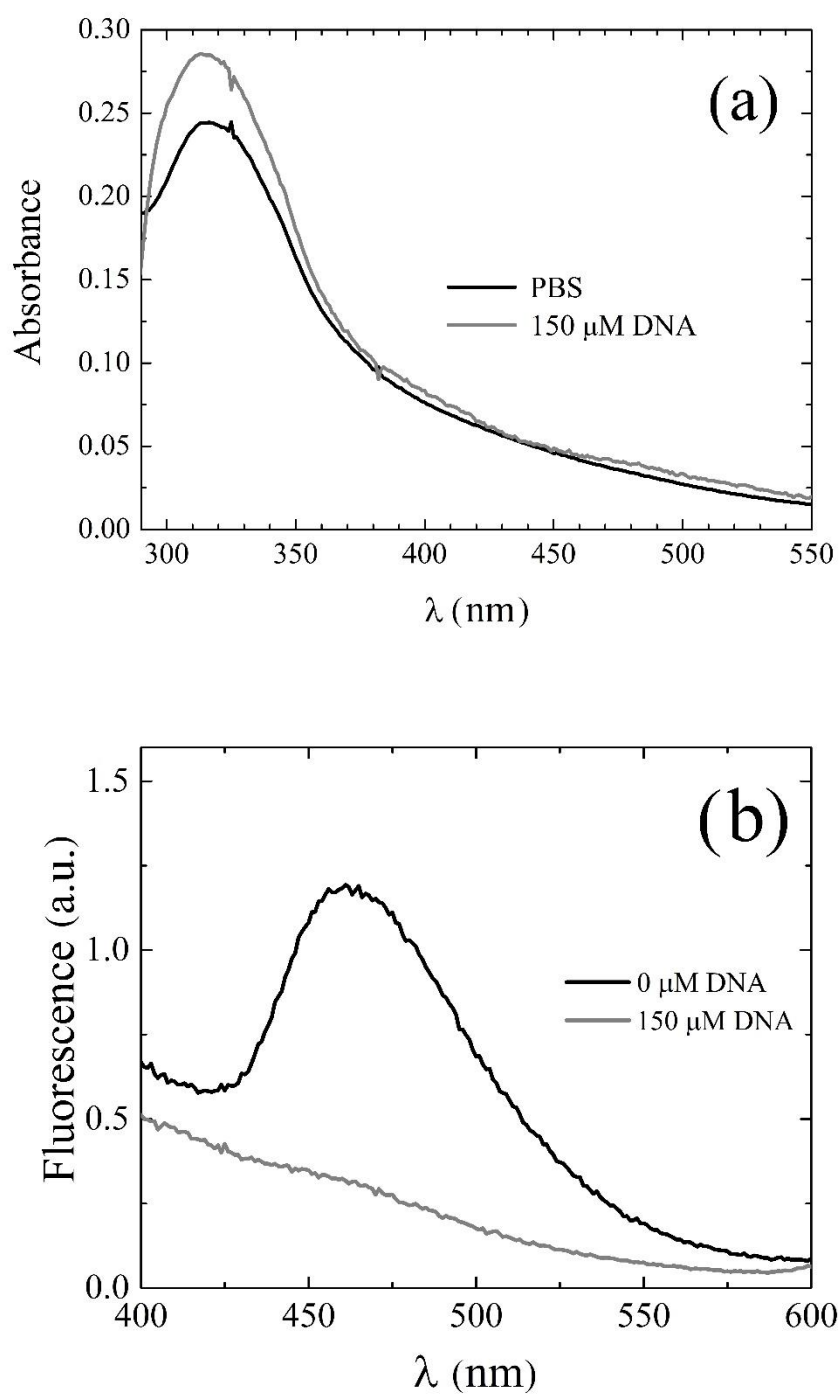

**Figure S6.** a) Absorption and b) emission spectra of **1** in aqueous environment (PBS) in the absence (black line) and presence (gray line) of DNA. The compound was preliminarily solubilized in DMF. Fluorescence was elicited upon excitation at 320 nm.

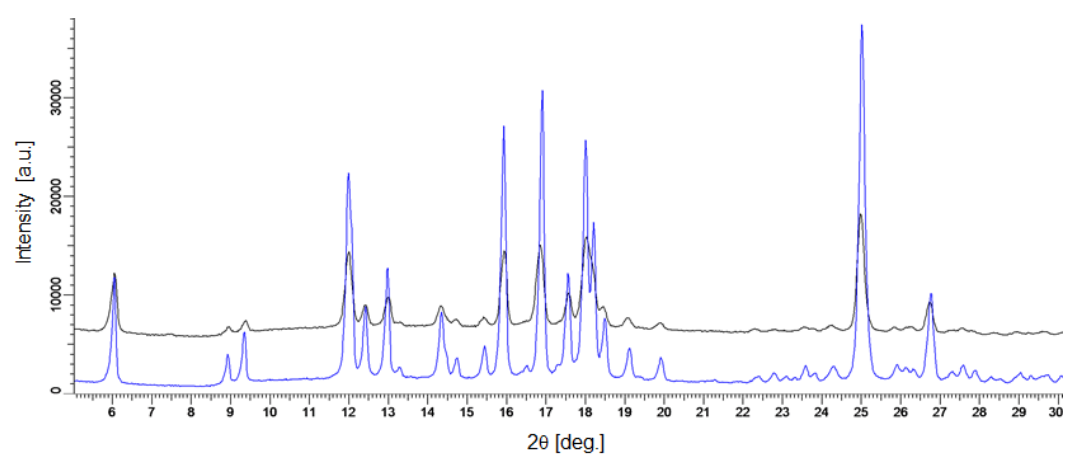

**Figure S7.** Low-to-medium angle portion of the powder X-ray diffraction pattern of two batches of complex **1** at comparison.

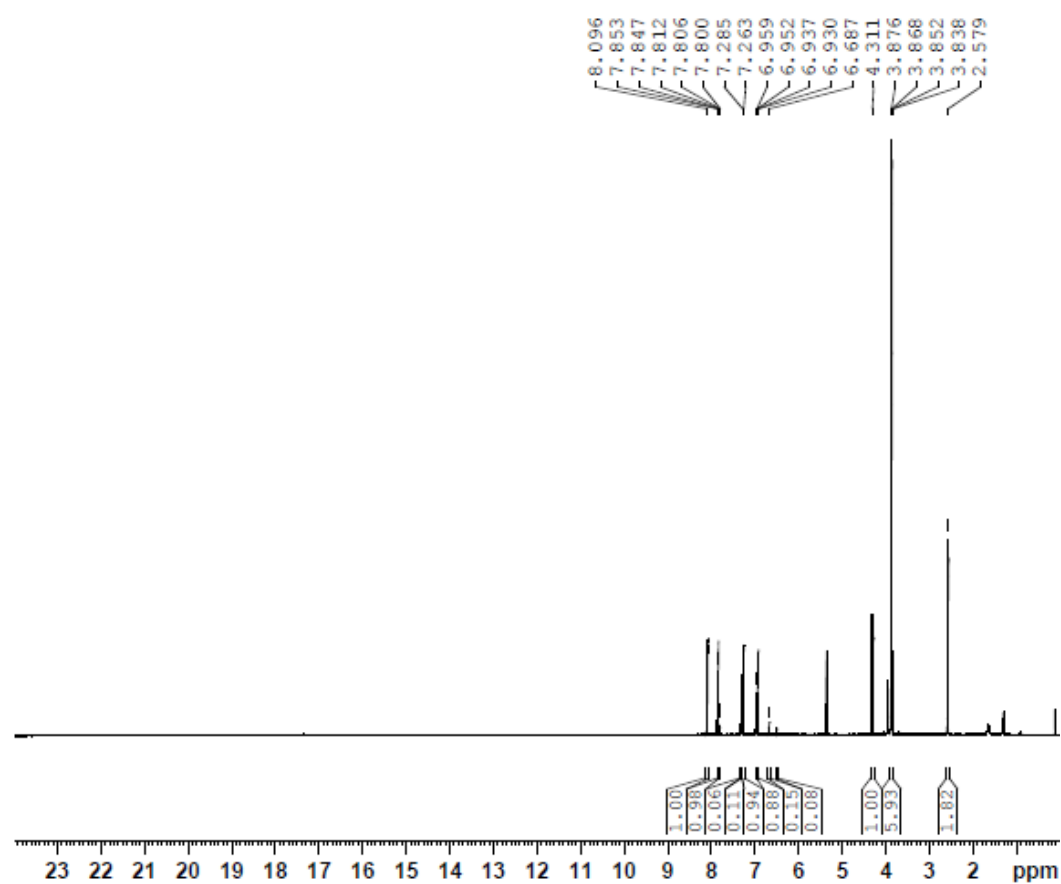

Figure S8. <sup>1</sup>H-NMR spectrum of 2.



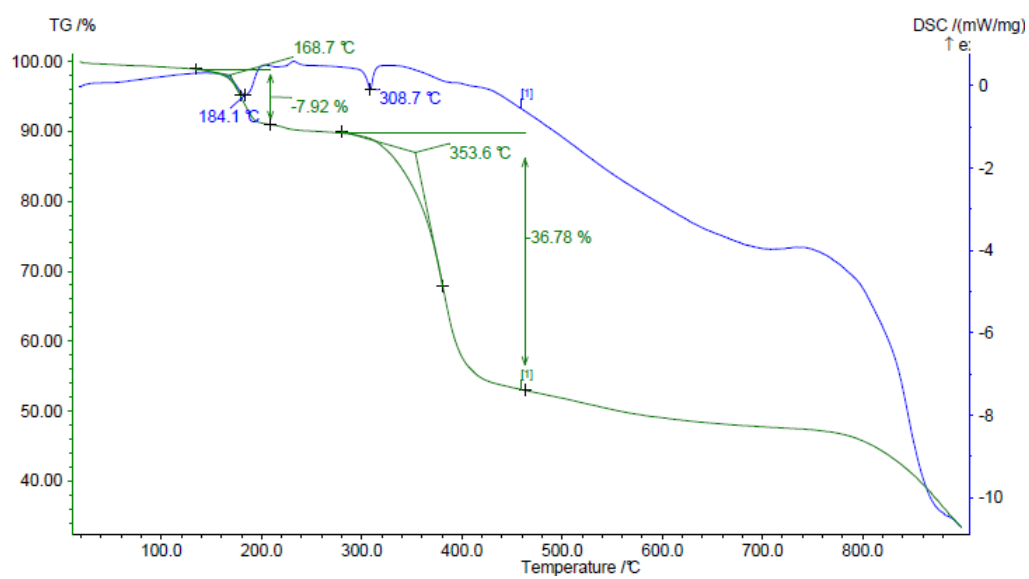

Figure S9. DSC (blue line) and TGA (green) traces of 2.

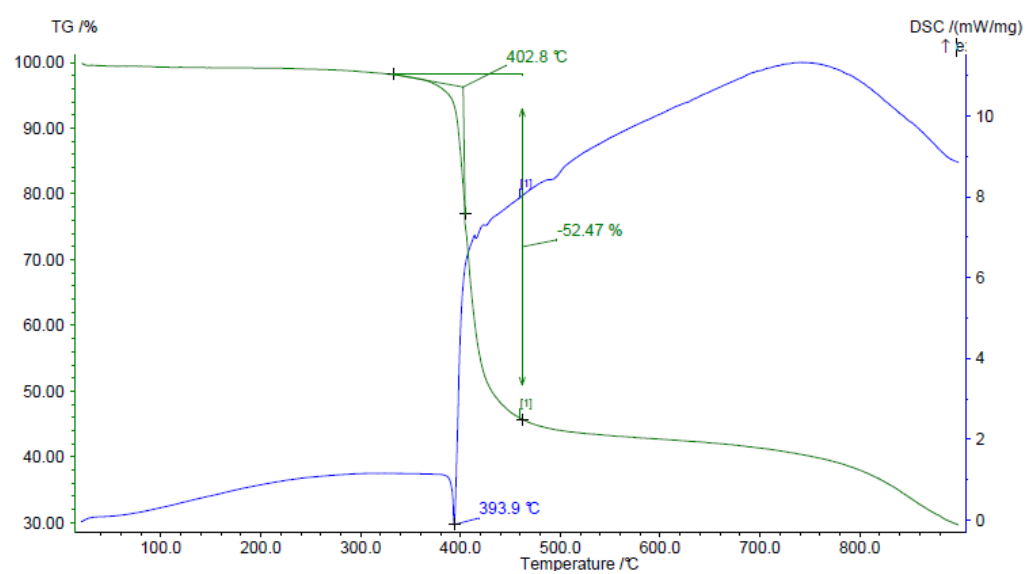

Figure S10. DSC (blue line) and TGA (green) traces of 1.

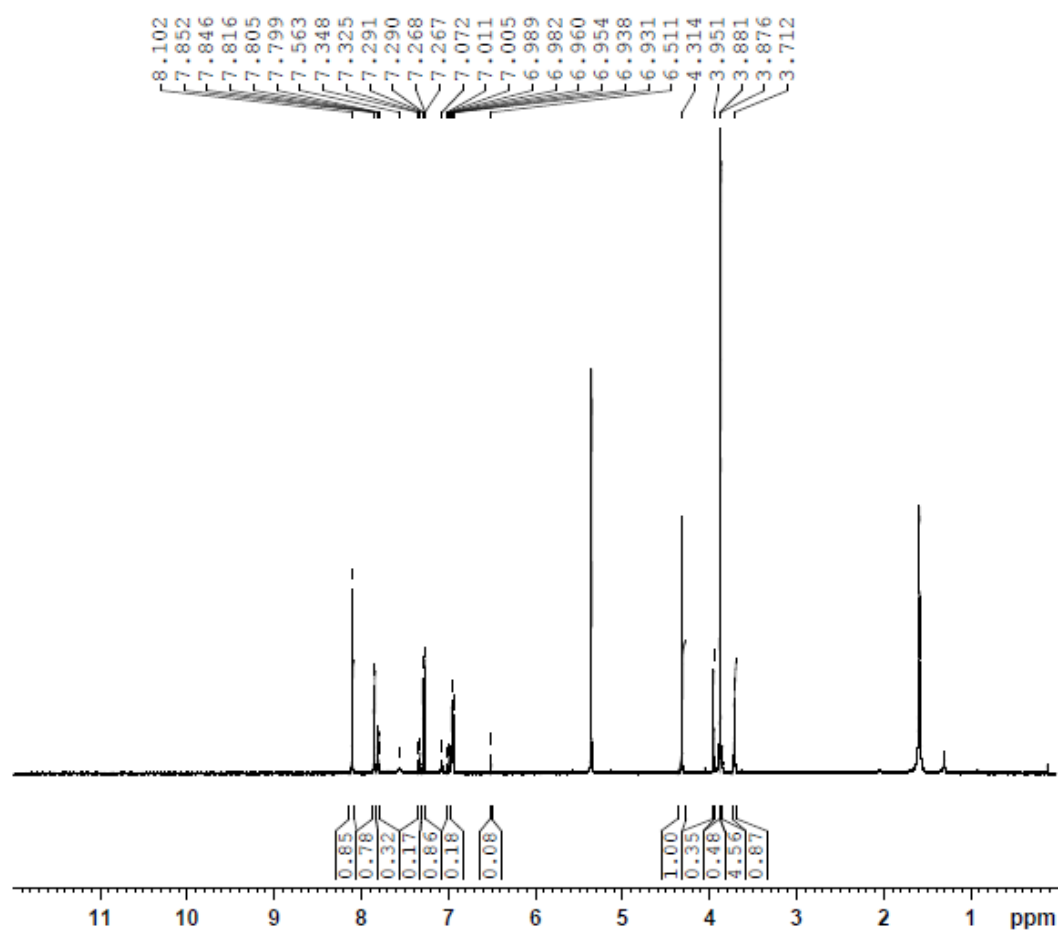Figure S11.  $^1\text{H}$ -NMR spectrum of 3.

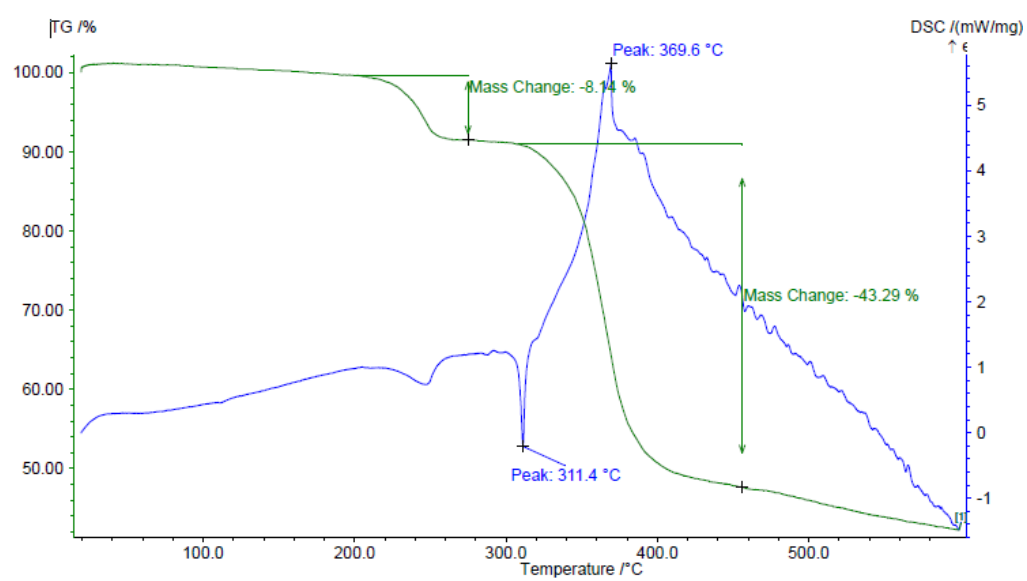

Figure S12. DSC (blue line) and TGA (green) traces of 3.

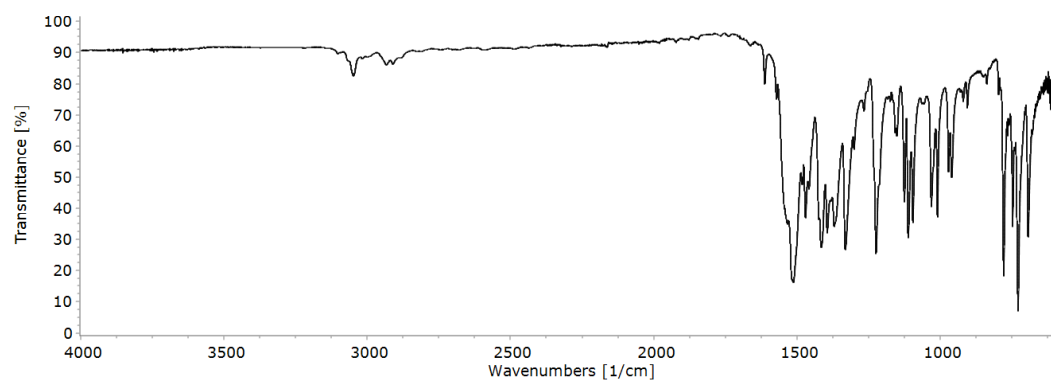

**Figure S13.** IR absorption spectrum of **2** in the 600 cm<sup>-1</sup> – 4000 cm<sup>-1</sup> spectral region.

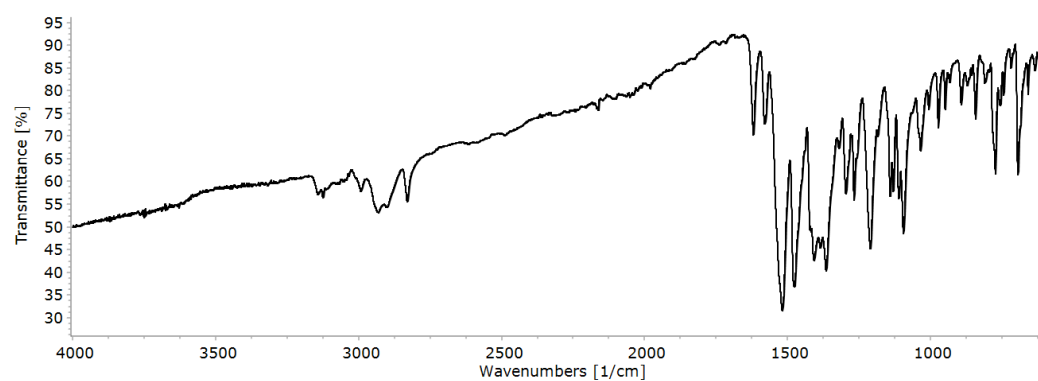

**Figure S14.** IR absorption spectrum of **3** in the  $600\text{ cm}^{-1}$  –  $4000\text{ cm}^{-1}$  spectral region.
